# Supplementary material
Source: PubMed Central journal article supplement (PMC6664815)
Supplement: NIHMS1029709-supplement-Supplemental_Information_.pdf [file NIHMS1029709-supplement-Supplemental_Information_.pdf]

**Structure, Volume xx**

**Supplemental Information**

**Structural Survey of Broadly Neutralizing Antibodies Targeting the HIV-1 Env Trimer Delineates Epitope Categories and Characteristics of Recognition**

**Gwo-Yu Chuang, Jing Zhou, Priyamvada Acharya, Reda Rawi, Chen-Hsiang Shen, Zizhang Sheng, Baoshan Zhang, Tongqing Zhou, Robert T. Bailer, Venkata P. Dandey, Nicole A. Doria-Rose, Mark K. Louder, Krishna McKee, John R. Mascola, Lawrence Shapiro, and Peter D. Kwong**

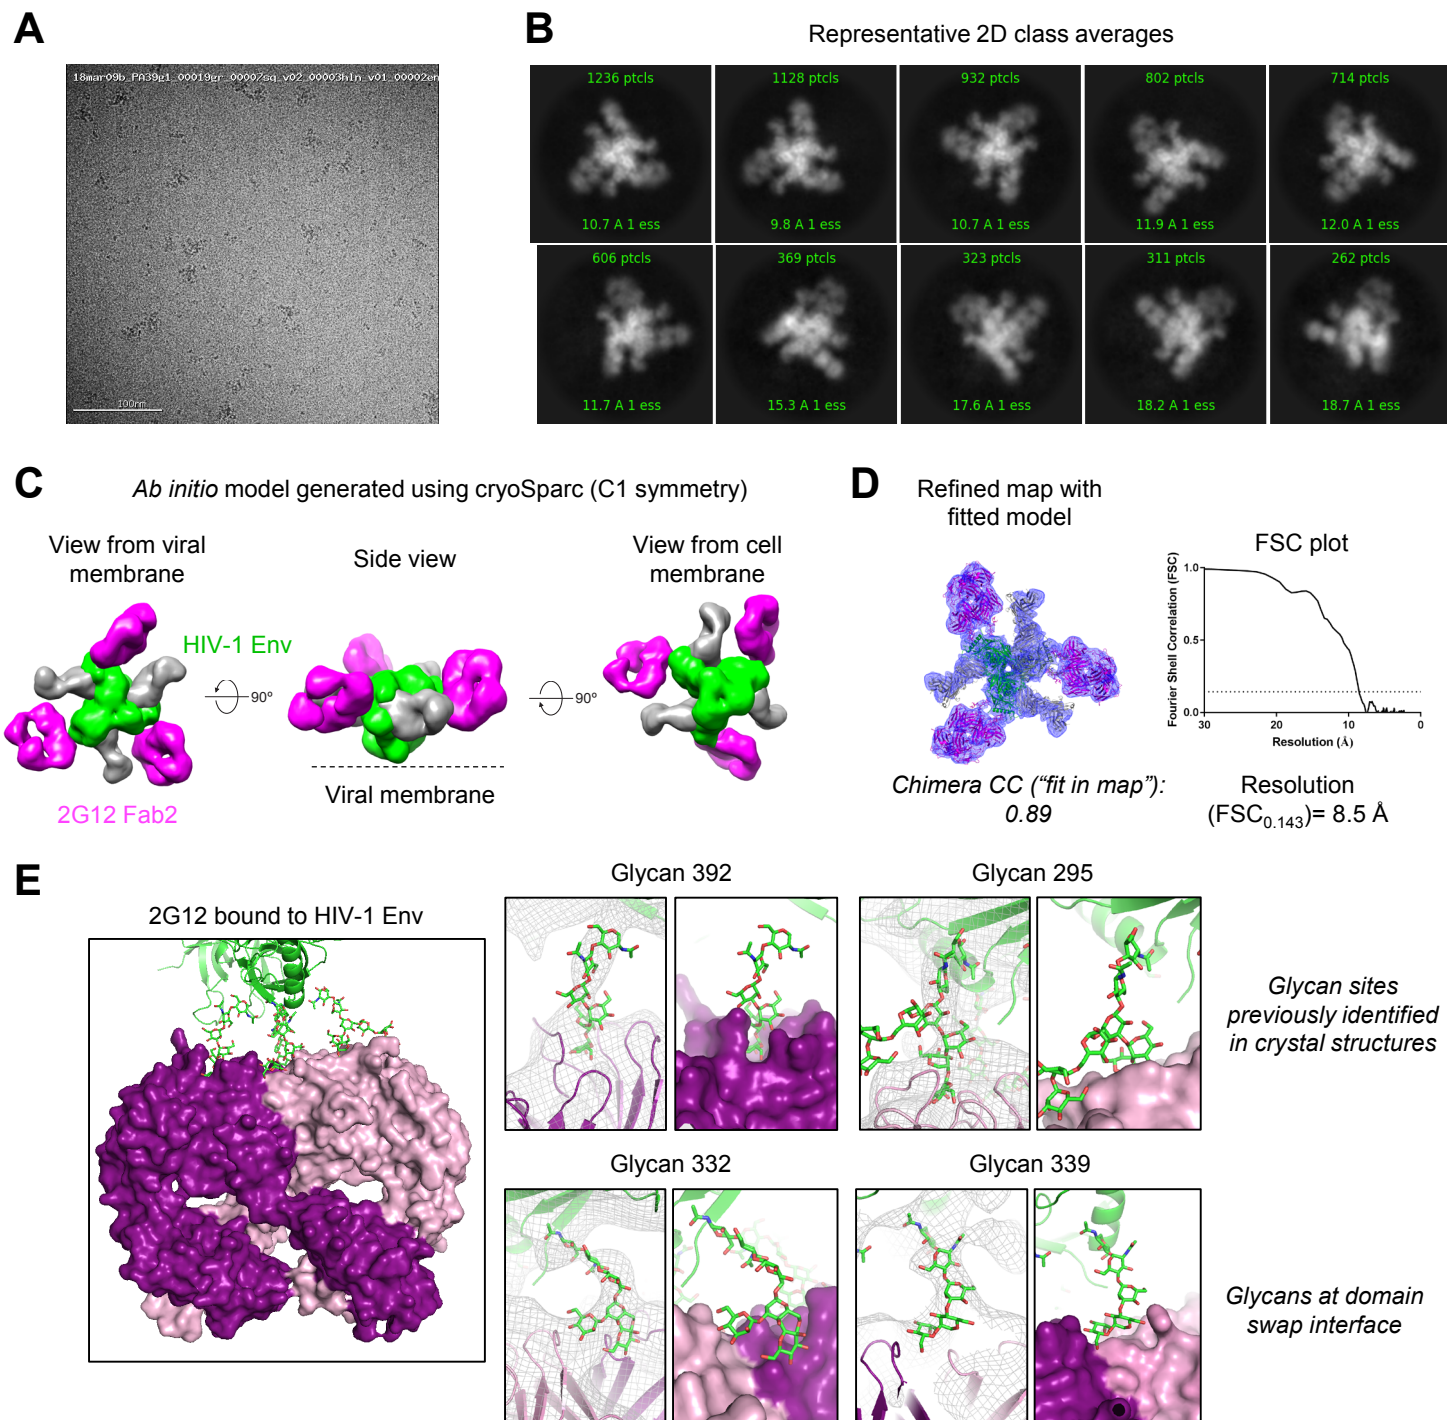

**Figure S1. Details of cryo-EM structure of HIV-1 BG505 DS-SOSIP in complex with antibodies VRC03 and 2G12. Related to Figures 1-3. (A)** Representative micrograph, **(B)** Representative 2D class averages **(C)** *Ab initio* model generated using cryoSparc showing HIV-1 Env in green VRC03 in grey and 2G12 in magenta. **(D)** Refined map fitted with model of BG505 DS-SOSIP (green) VRC03 (grey) and 2G12 (magenta) (left) Fourier shell correlation plotted as a function of resolution with resolution reported according to the gold standard FSC<sub>0.143</sub> criterion (FSC<sub>0.143</sub> shown as dotted line) (right). **(E)** Details of HIV-1 Env glycan interactions with 2G12. Left. Domain swapped 2G12 shown in surface representation (magenta and pink) bound to HIV-1 Env (green ribbon with glycans shown as sticks). Right. Details of the interactions of 2G12 with the four glycans in its binding site. For each pair of figures for the 4 glycans, the left image shows the Env and 2G12 as ribbons, glycans as sticks, and electron density as grey mesh. The right images show 2G12 as surface, Env as ribbon, and glycans as sticks.

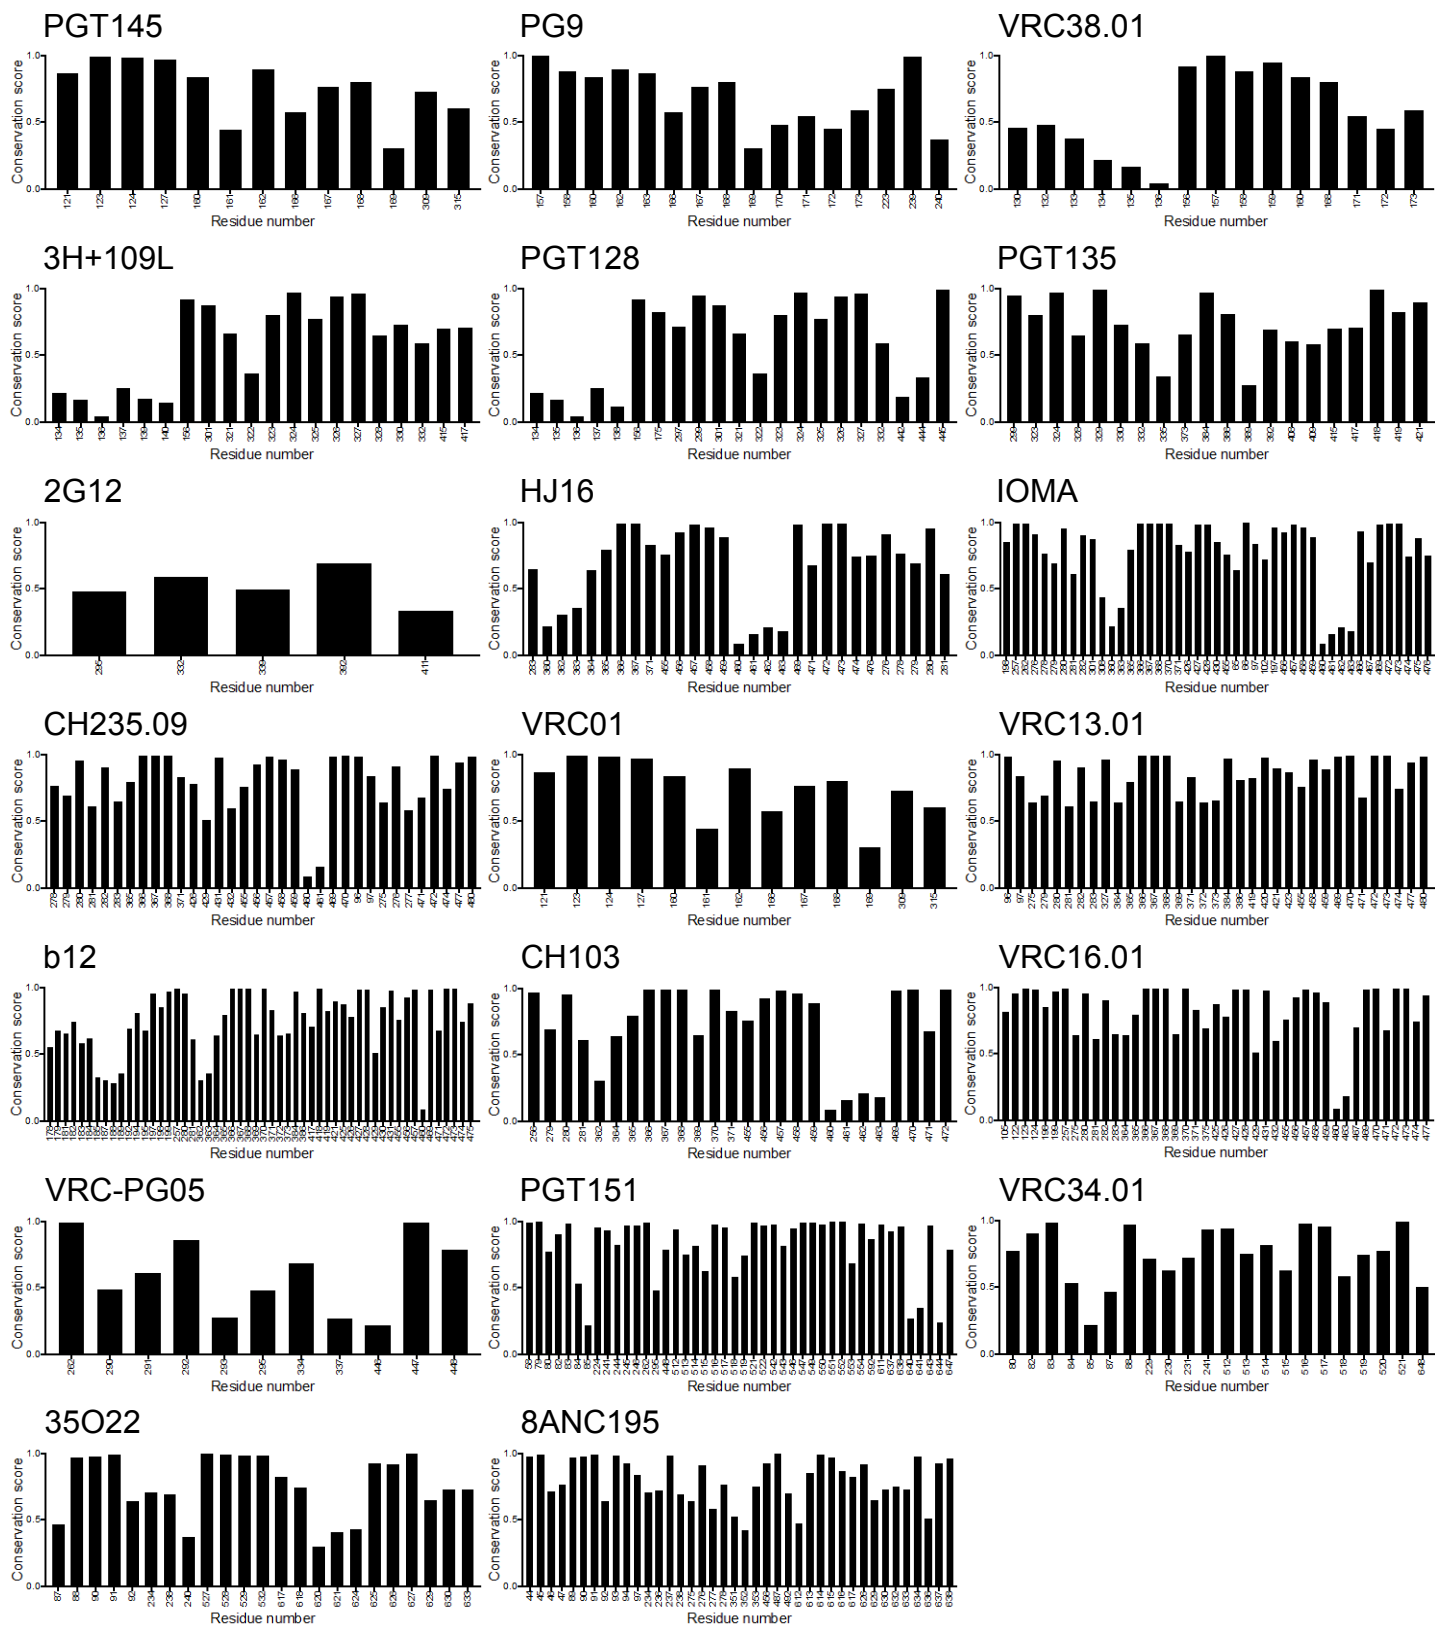

**Figure S2. Conservation score for individual epitope residues.** Related to Figure 3. Conservation score 0 indicates the most variable, whereas score 1 indicates the most conserved.

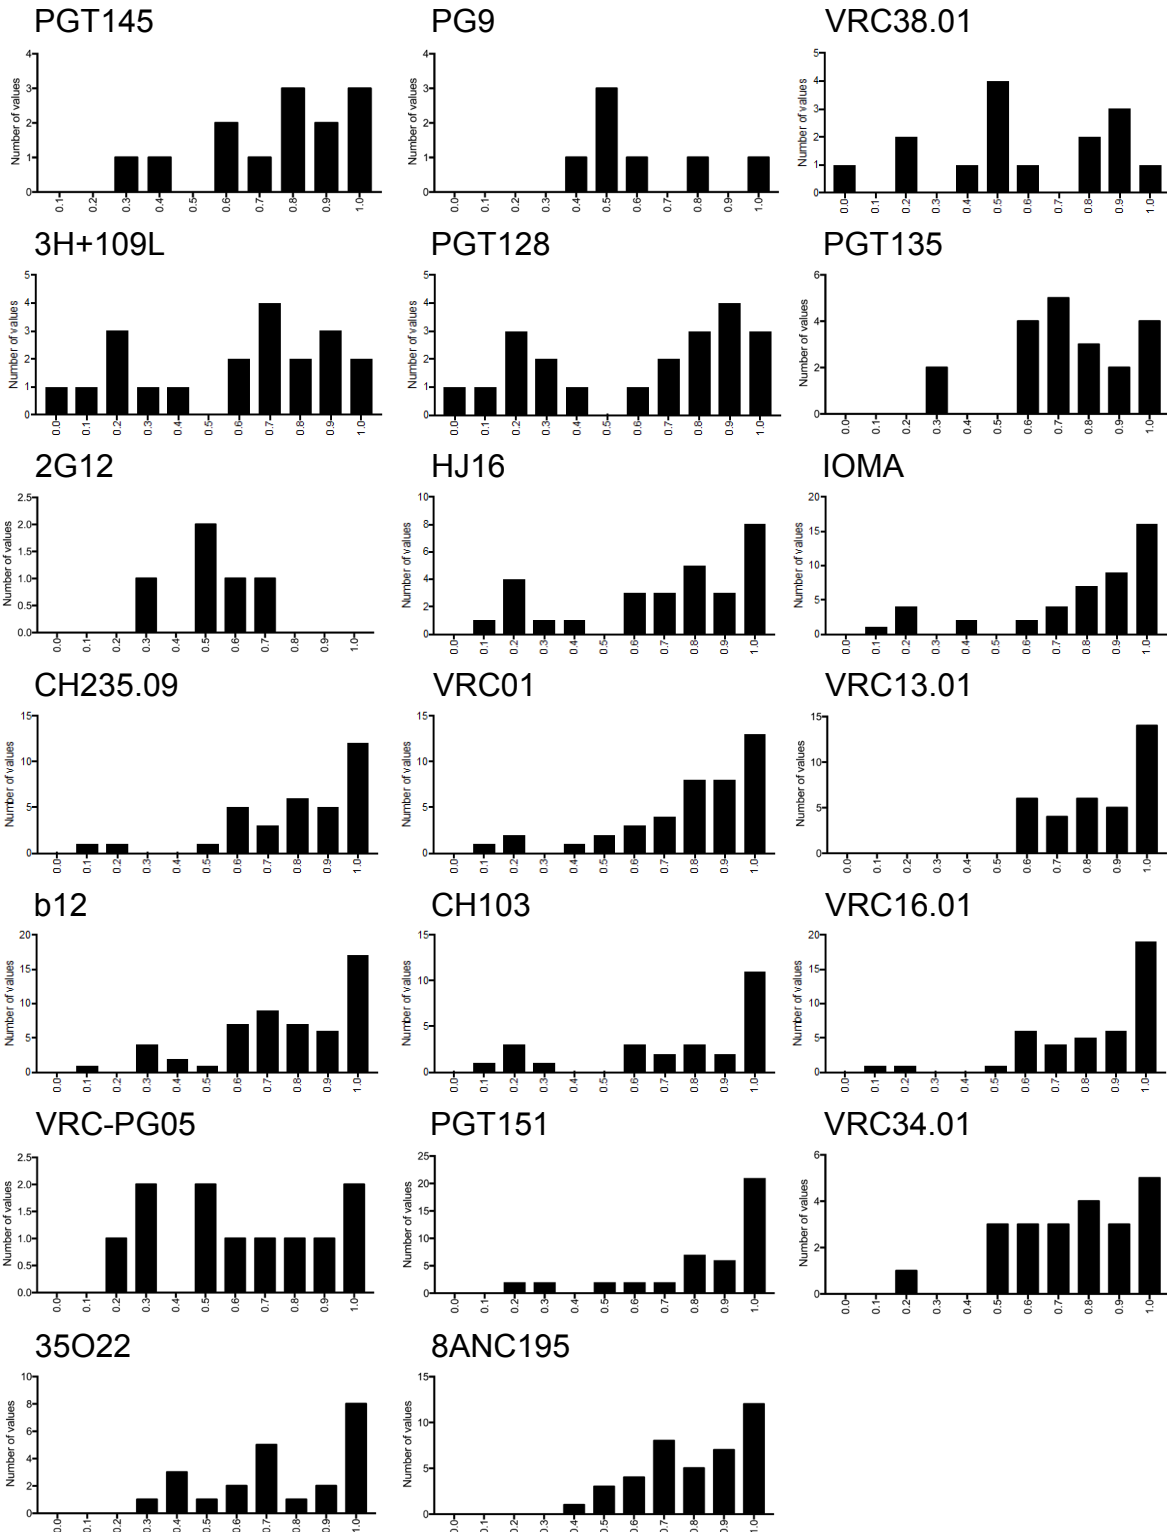

**Figure S3. Histogram distribution of conservation score for individual epitope residues.** Related to Figure 3.

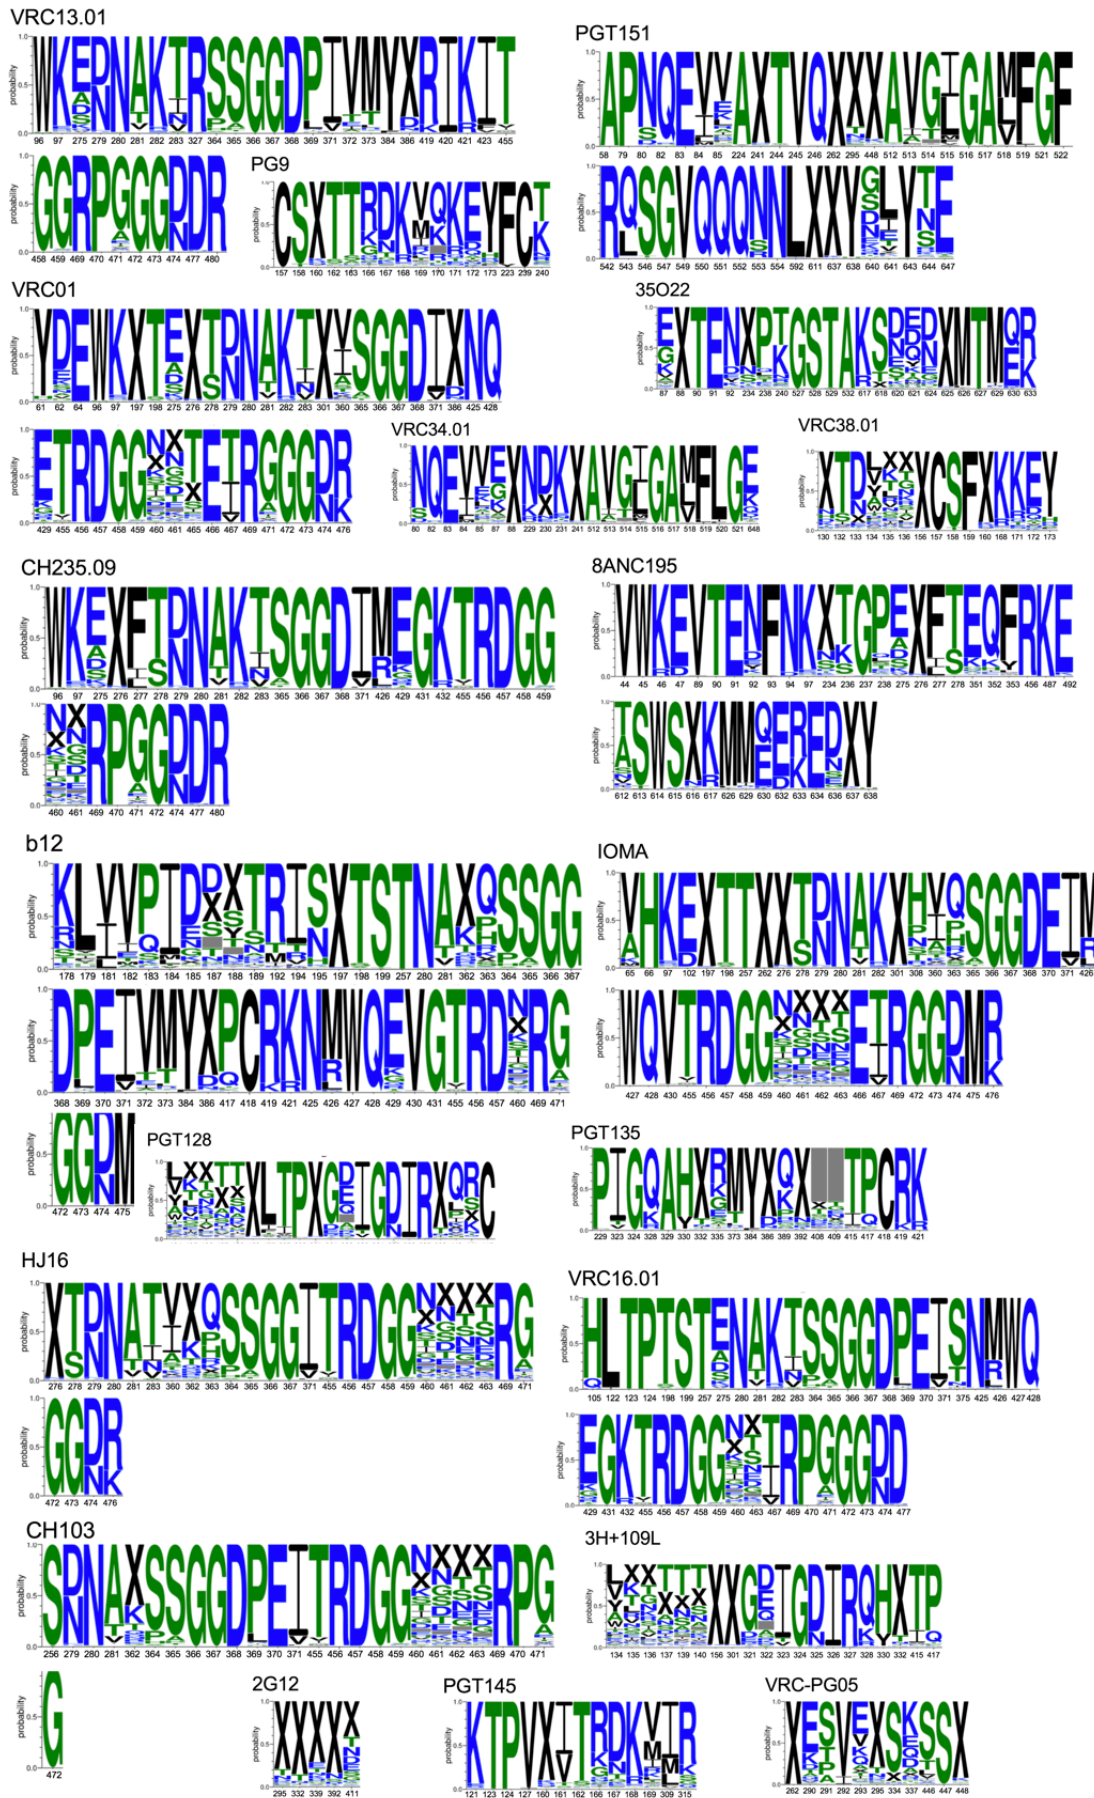

**Figure S4. WebLogo Plots for individual epitope residues.** Related to Figure 3. X denotes putative N-linked glycosylation sequon. The plots were generated using [https://www.hiv.lanl.gov/content/sequence/ANALYZEALIGN/analyze\\_align.html](https://www.hiv.lanl.gov/content/sequence/ANALYZEALIGN/analyze_align.html).



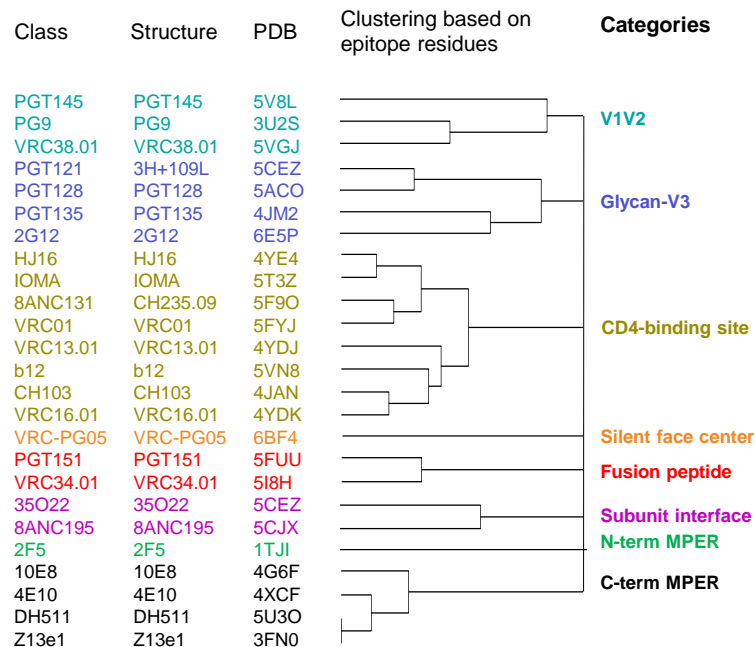

**Figure S5. MPER antibodies segregate into two additional categories, N-term MPER and C-term MPER.** Related to Figure 1. Representative antibody-Env structures and PDBs for MPER-directed HIV-1 neutralizing antibodies (10E8, 2F5, 4E10, DH511 and Z13e1) were analyzed with representative antibodies recognizing the prefusion-closed Env trimer by neighbor-joining analysis based on epitope-residue overlap (dendrogram). The MPER antibodies segregated into two additional categories, N-term MPER (containing the single antibody 2F5, which recognizes primarily residues 661-670) and C-term MPER (containing antibodies 10E8, 4DE10, DH5511 and Z13e1, which recognize primarily residues 671-683).

**Table S1. Matrix of epitope distances among 20 unique antibodies.** Epitope distance between each of the antibody is defined as  $1 - \frac{n_o}{N_s}$ , where  $n_o$  is the number of overlapping epitope residues, and  $N_s$  is the number of epitope residues for the antibody with the least number of epitope residues of the two. Related to Figure 1.

|          | PGT145 | PG9  | VRC38.01 | 3H+109L | PGT128 | PGT135 | 2G12 | HJ16 | IOMA | CH235.09 | VRC01 | VRC13.01 | b12  | CH103 | VRC16.01 | VRC-PG05 | PGT151 | VRC34.01 | 35O22 | 8ANC195 |      |
|----------|--------|------|----------|---------|--------|--------|------|------|------|----------|-------|----------|------|-------|----------|----------|--------|----------|-------|---------|------|
| PGT145   | 0      | 0.54 | 0.85     | 1       | 1      | 1      | 1    | 1    | 1    | 1        | 1     | 1        | 1    | 1     | 0.85     | 1        | 1      | 1        | 1     | 1       | 1    |
| PG9      | 0.54   | 0    | 0.46     | 1       | 1      | 1      | 1    | 1    | 1    | 1        | 1     | 1        | 1    | 1     | 1        | 1        | 1      | 1        | 1     | 1       | 1    |
| VRC38.01 | 0.85   | 0.46 | 0        | 0.73    | 0.73   | 1      | 1    | 1    | 1    | 1        | 1     | 1        | 1    | 1     | 1        | 1        | 1      | 1        | 1     | 1       | 1    |
| 3H+109L  | 1      | 1    | 0.73     | 0       | 0.3    | 0.65   | 0.8  | 1    | 0.95 | 1        | 0.95  | 0.95     | 0.95 | 1     | 1        | 1        | 1      | 1        | 1     | 1       | 1    |
| PGT128   | 1      | 1    | 0.73     | 0.3     | 0      | 0.8    | 0.8  | 1    | 0.95 | 1        | 0.95  | 0.95     | 1    | 1     | 1        | 1        | 1      | 1        | 1     | 1       | 1    |
| PGT135   | 1      | 1    | 1        | 0.65    | 0.8    | 0      | 0.6  | 1    | 1    | 1        | 0.95  | 0.75     | 0.65 | 1     | 1        | 1        | 1      | 1        | 1     | 1       | 1    |
| 2G12     | 1      | 1    | 1        | 0.8     | 0.8    | 0.6    | 0    | 1    | 1    | 1        | 1     | 1        | 1    | 1     | 0.8      | 0.8      | 1      | 1        | 1     | 1       | 1    |
| HJ16     | 1      | 1    | 1        | 1       | 1      | 1      | 1    | 0    | 0.14 | 0.28     | 0.17  | 0.41     | 0.38 | 0.19  | 0.31     | 1        | 1      | 1        | 1     | 1       | 0.9  |
| IOMA     | 1      | 1    | 1        | 0.95    | 0.95   | 1      | 1    | 0.14 | 0    | 0.32     | 0.26  | 0.51     | 0.44 | 0.23  | 0.4      | 0.91     | 0.98   | 1        | 1     | 1       | 0.9  |
| CH235.09 | 1      | 1    | 1        | 1       | 1      | 1      | 1    | 0.28 | 0.32 | 0        | 0.21  | 0.32     | 0.47 | 0.27  | 0.24     | 1        | 1      | 1        | 1     | 1       | 0.82 |
| VRC01    | 1      | 1    | 1        | 0.95    | 0.95   | 0.95   | 1    | 0.17 | 0.26 | 0.21     | 0     | 0.37     | 0.48 | 0.31  | 0.38     | 1        | 1      | 1        | 1     | 1       | 0.88 |
| VRC13.01 | 1      | 1    | 1        | 0.95    | 0.95   | 0.75   | 1    | 0.41 | 0.51 | 0.32     | 0.37  | 0        | 0.4  | 0.35  | 0.37     | 1        | 1      | 1        | 1     | 1       | 0.94 |
| b12      | 1      | 1    | 1        | 0.95    | 1      | 0.65   | 1    | 0.38 | 0.44 | 0.47     | 0.48  | 0.4      | 0    | 0.31  | 0.35     | 1        | 1      | 1        | 1     | 1       | 0.97 |
| CH103    | 1      | 1    | 1        | 1       | 1      | 1      | 1    | 0.19 | 0.23 | 0.27     | 0.31  | 0.35     | 0.31 | 0     | 0.19     | 1        | 1      | 1        | 1     | 1       | 0.96 |
| VRC16.01 | 0.85   | 1    | 1        | 1       | 1      | 1      | 1    | 0.31 | 0.4  | 0.24     | 0.38  | 0.37     | 0.35 | 0.19  | 0        | 1        | 1      | 1        | 1     | 1       | 0.95 |
| VRC-PG05 | 1      | 1    | 1        | 1       | 1      | 1      | 0.8  | 1    | 0.91 | 1        | 1     | 1        | 1    | 1     | 1        | 0        | 0.73   | 1        | 1     | 1       | 1    |
| PGT151   | 1      | 1    | 1        | 1       | 1      | 1      | 0.8  | 1    | 0.98 | 1        | 1     | 1        | 1    | 1     | 1        | 0.73     | 0      | 0.32     | 1     | 1       | 0.95 |
| VRC34.01 | 1      | 1    | 1        | 1       | 1      | 1      | 1    | 1    | 1    | 1        | 1     | 1        | 1    | 1     | 1        | 1        | 0.32   | 0        | 0.91  | 1       | 1    |
| 35O22    | 1      | 1    | 1        | 1       | 1      | 1      | 1    | 1    | 1    | 1        | 1     | 1        | 1    | 1     | 1        | 1        | 1      | 0.91     | 0     | 0.57    | 1    |
| 8ANC195  | 1      | 1    | 1        | 1       | 1      | 1      | 1    | 0.9  | 0.9  | 0.82     | 0.88  | 0.94     | 0.97 | 0.96  | 0.95     | 1        | 0.95   | 1        | 0.57  | 0       | 0    |

**Table S2. NGS reads statistics.** Related to Figures 2 and 5.

**Table S2A. Heavy chain Read statistics for normal donor data sets associated with Healthy Donor NGS.**

|                       | LP32647 | LP23810 | LP08248 |
|-----------------------|---------|---------|---------|
| RAW Reads             | 232,094 | 261,224 | 300,213 |
| ≥ 350 nucleotide      | 216,971 | 248,046 | 286,701 |
| VH assignment         | 203,869 | 203,872 | 223,172 |
| Average CDR H3 length | 13.42   | 14.46   | 13.82   |
| Average SHM           | 9.59    | 8.21    | 8.39    |

**Table S2B. Lambda chain read statistics for normal donor data sets associated with Healthy Donor NGS.**

|                  | LP32647 | LP23810 | LP08248 |
|------------------|---------|---------|---------|
| RAW Reads        | 208,141 | 159,365 | 284,437 |
| ≥ 300 nucleotide | 186,441 | 145,904 | 274,687 |
| VL assignment    | 185,972 | 144,632 | 272,667 |
| Average SHM      | 5.4     | 4.66    | 5.64    |

**Table S2C. Kappa chain read statistics for normal donor data sets associated with Healthy Donor NGS.**

|                  | LP32647 | LP23810 | LP08248 |
|------------------|---------|---------|---------|
| RAW Reads        | 295,412 | 316,019 | 296,609 |
| ≥ 300 nucleotide | 285,178 | 304,104 | 283,451 |
| VK assignment    | 284,590 | 299,672 | 269,184 |
| Average SHM      | 4.78    | 3.32    | 4.80    |



**Table S2D. Vgene reads of 20 representative antibody for normal donor data sets associated with Healthy Donor NGS.**

| Antibody | Vgene    | LP32647 | LP23810 | LP08248 |
|----------|----------|---------|---------|---------|
| PGT145   | IGHV1-8  | 2090    | 734     | 2640    |
| PG9      | IGHV3-33 | 14      | 4533    | 1347    |
| VRC38.01 | IGHV3-13 | 89      | 443     | 9       |
| PGT121   | IGHV4-59 | 9984    | 735     | 7879    |
| PGT128   | IGHV4-39 | 57613   | 0       | 47240   |
| PGT135   | IGHV4-39 | 57613   | 0       | 47240   |
| 2G12     | IGHV3-21 | 1742    | 24324   | 2376    |
| HJ16     | IGHV3-30 | 3784    | 6013    | 3911    |
| IOMA     | IGHV1-2  | 7151    | 18158   | 9054    |
| 8ANC131  | IGHV1-46 | 2245    | 1334    | 2632    |
| VRC01    | IGHV1-2  | 7151    | 18158   | 9054    |
| VRC13.01 | IGHV1-69 | 11115   | 10453   | 6862    |
| b12      | IGHV1-3  | 1694    | 0       | 0       |
| CH103    | IGHV4-59 | 9984    | 735     | 7879    |
| VRC16.01 | IGHV3-23 | 2658    | 19767   | 8705    |
| VRC-PG05 | IGHV3-7  | 2634    | 16492   | 14298   |
| PGT151   | IGHV3-30 | 3784    | 6013    | 3911    |
| VRC34    | IGHV1-2  | 7151    | 18158   | 9054    |
| 35O22    | IGHV1-18 | 3004    | 1514    | 2500    |
| 8ANC195  | IGHV1-69 | 11115   | 10453   | 6862    |

**Table S3. Structural details for MPER antibodies in complex with HIV-1 Env. Related to Figure 1.**

| Category    | Class | Antibody with most informative structure | Most informative PDB | Experiment method | Resolution (Å) | Env component | Epitope Residues                                                             |
|-------------|-------|------------------------------------------|----------------------|-------------------|----------------|---------------|------------------------------------------------------------------------------|
| N-term MPER | 2F5   | 2F5                                      | 1TJI                 | X-ray             | 2.20           | MPER peptide  | E657, Q658, E659, L661, E662, L663, D664, K665, W666, A667, L669, W670       |
| C-term MPER | 10E8  | 10E8                                     | 4G6F                 | X-ray             | 2.10           | MPER peptide  | S668, L669, W670, N671, W672, F673, T676, N677, L679, W680, I682, R683       |
|             | 4E10  | 4E10                                     | 4XCF                 | X-ray             | 1.43           | MPER peptide  | N671, W672, W673, D674, I675, T676, N677, W678, L679, W680, K683             |
|             | DH511 | DH511                                    | 5U3O                 | X-ray             | 1.76           | MPER peptide  | K669, W670, N671, W672, F673, D674, I675, T676, N677, L679, W680, I682, R683 |
|             | Z13e1 | Z13e1                                    | 3FN0                 | X-ray             | 1.80           | MPER peptide  | W670, N671, W672, F673, D674, I675, T676, N677                               |
